# Supplementary material for: Enhancing electrochemical methane coupling in solid oxide cells by tuning oxygen species in the catalyst
Source: Royal Society of Chemistry journal article supplement (doi:10.1039/d3ta07648b), 2024-01-01
Supplement: d3ta07648b1.pdf [file d3ta07648b1.pdf]

## Supplementary information

### Enhancing electrochemical methane coupling in solid oxide cells by tuning oxygen species in the catalyst

Xiaoyong Xu <sup>\*a1</sup>, Haobo Li <sup>a1</sup>, Xu Han <sup>a</sup>, Yao Zheng <sup>\*a</sup>

<sup>a</sup> School of Chemical Engineering, The University of Adelaide, SA 5005, Australia.

\* E-mail: [xiaoyong.xu@adelaide.edu.au](mailto:xiaoyong.xu@adelaide.edu.au); [yao.zheng01@adelaide.edu.au](mailto:yao.zheng01@adelaide.edu.au);

<sup>1</sup> These authors contributed equally to this work.

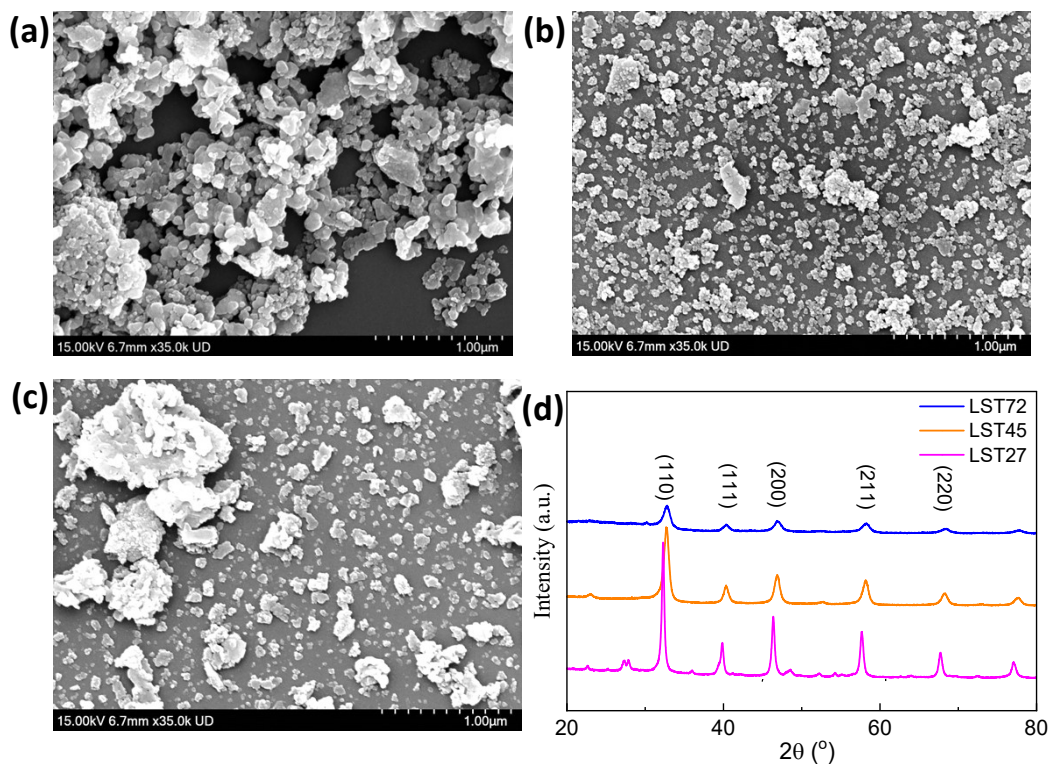

Fig. S1 Morphology of LST powder (a) LST27; (b) LST45; (c) LST72; (d) XRD patterns for LST.

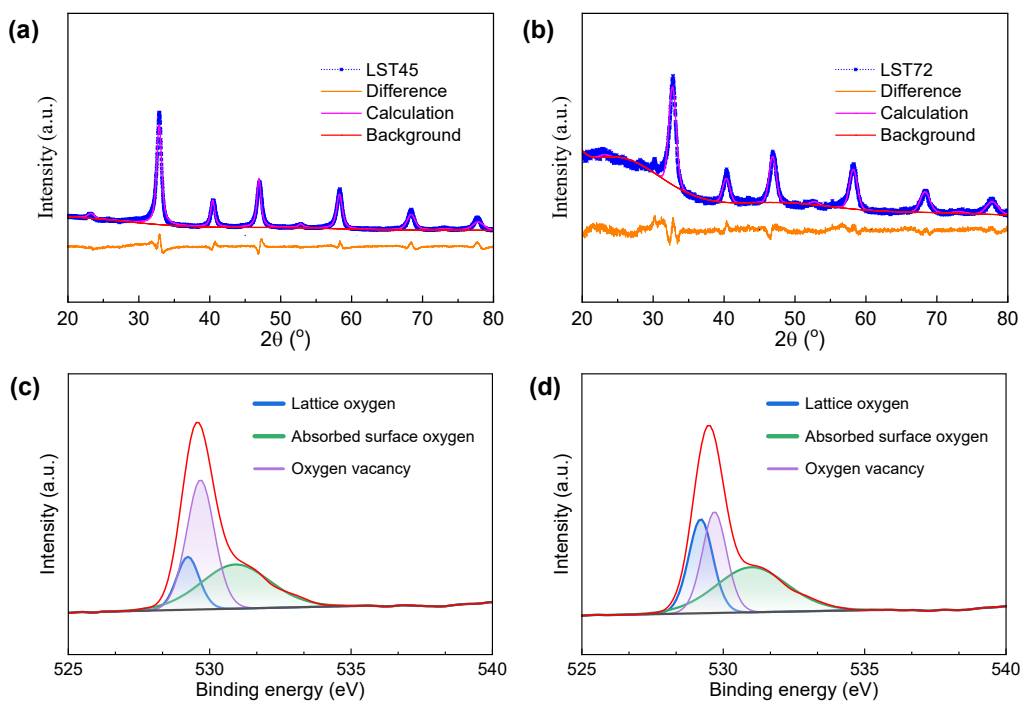

Fig. S2 X-ray diffraction Rietveld refinements of LST powder (a) LST45; (b) LST72; XPS for LST (c) LST45; (d) LST72.

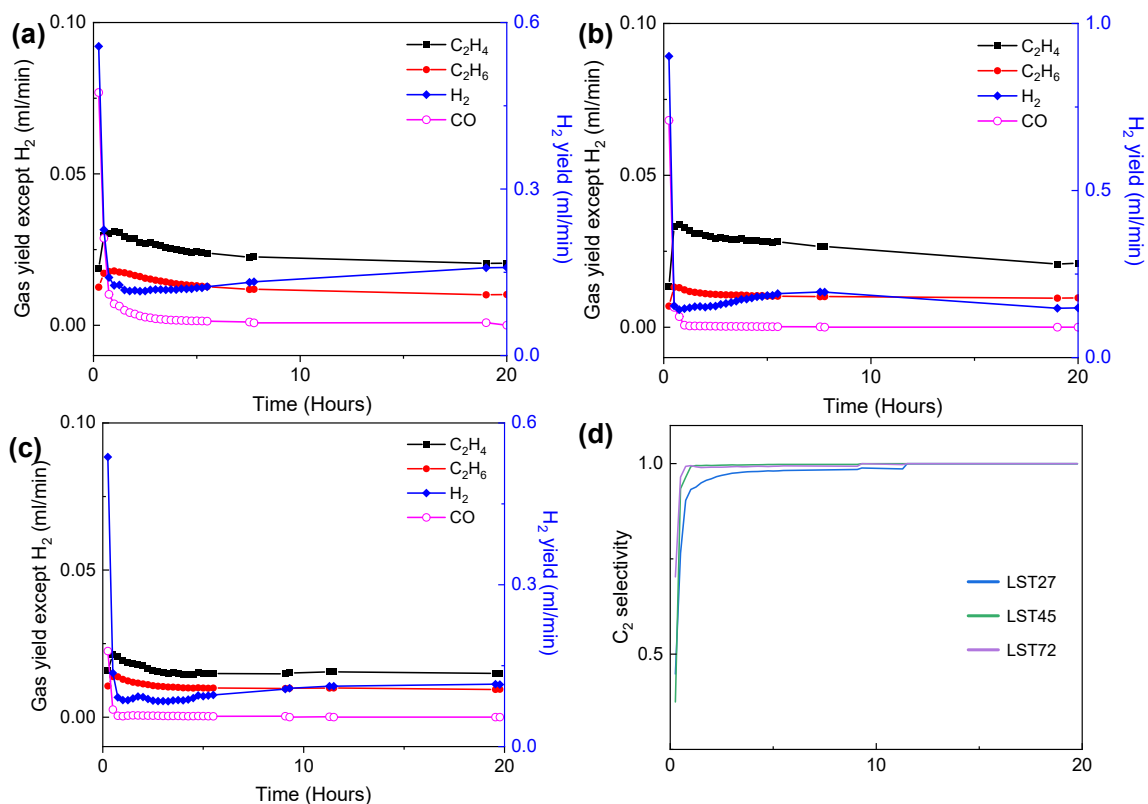

Fig. S3 Total concentration of hydrogen and CO during nonoxidative methane coupling at 850 °C with (a)LST27GDC; (b)LST45GDC; (c)LST72GDC; (d) C<sub>2</sub> selectivity.

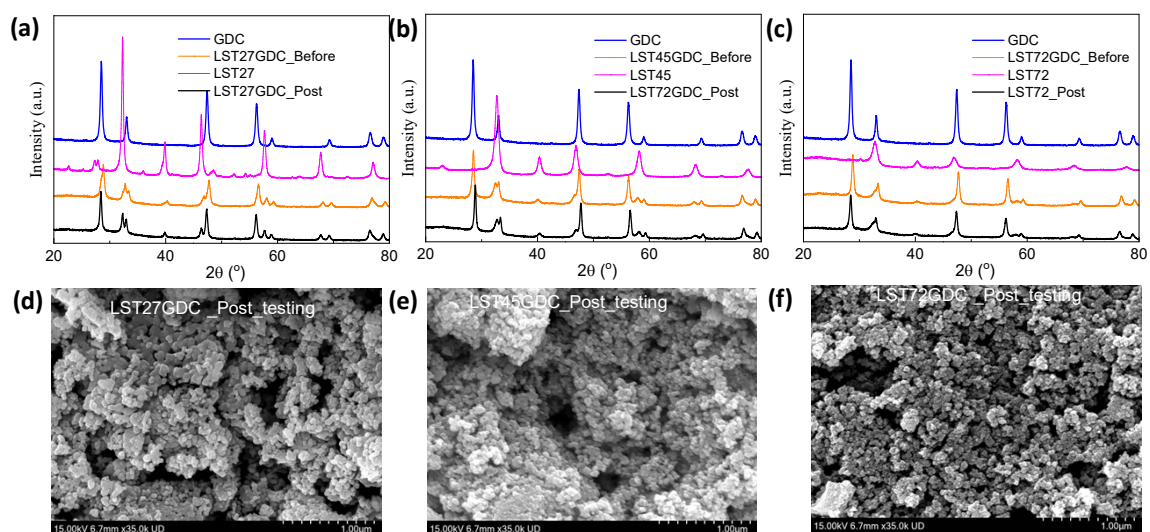

Fig. S4 XRD patterns of the samples before testing (a) LST27; (b) LST45 and (c) LST72, SEM images post testing (d) LST27GDC; (e) LST45GDC; (f) LST72GDC.

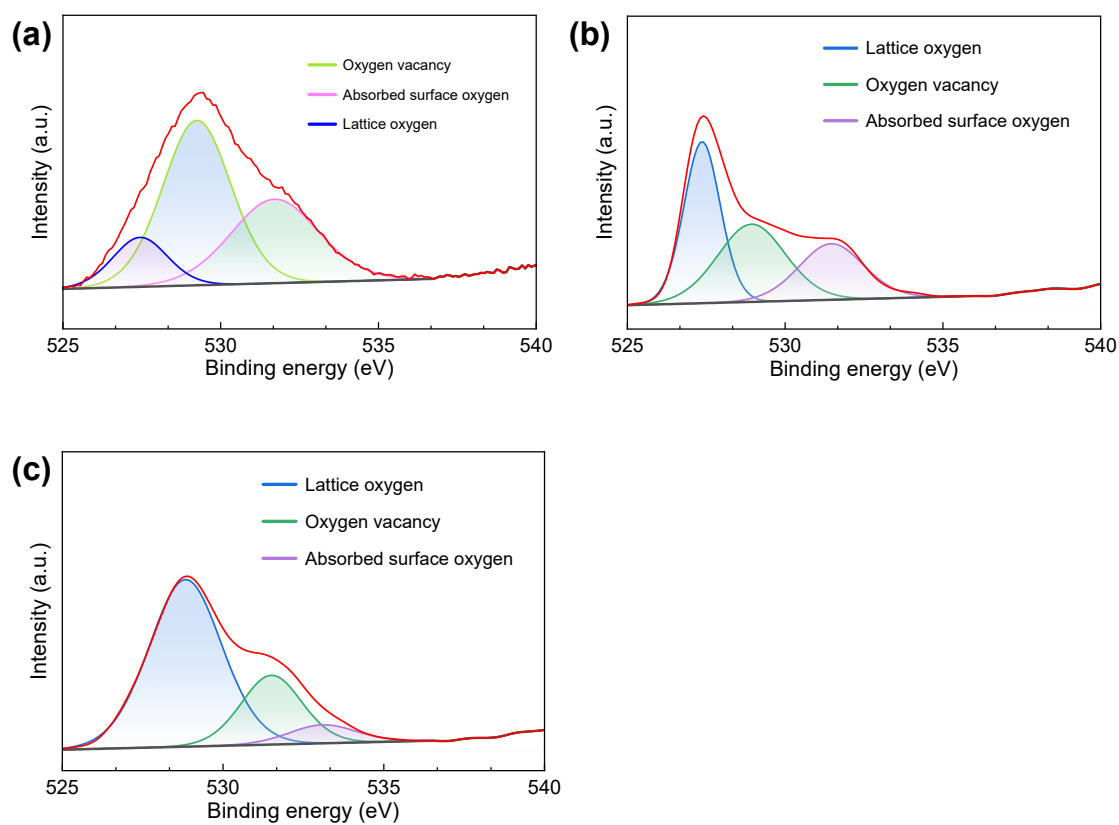

Fig. S5 O 1sXPS spectra of (a) LST27 after methane coupling; (b) LST45 after methane coupling; (c) LST72 after methane coupling.

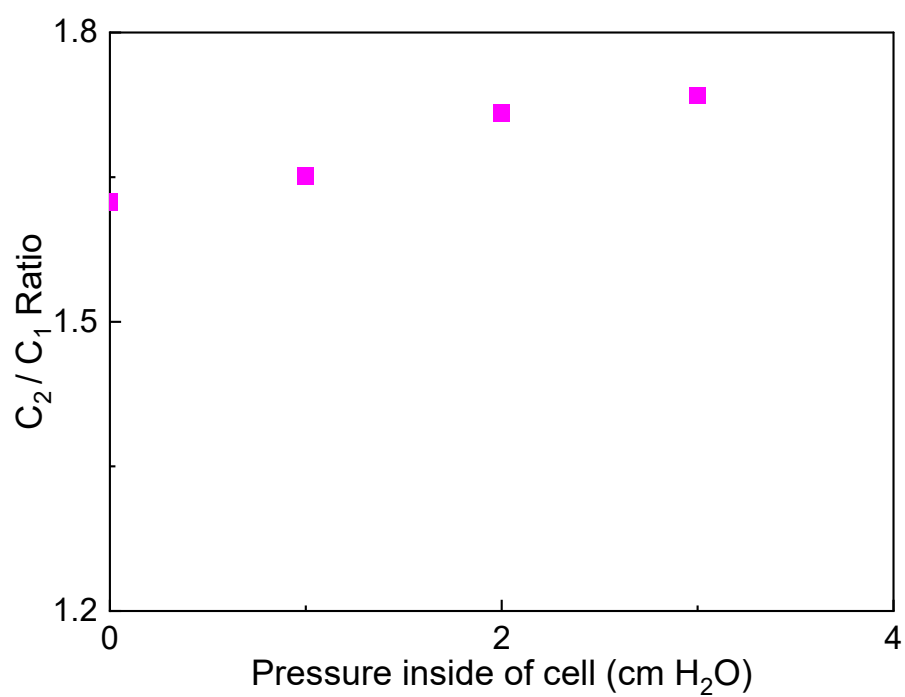

Fig. S6  $C_2/C_1$  ratio as a function of positive pressure inside of anode chamber (cm H<sub>2</sub>O), 100ml/m air and 50ml/m CH<sub>4</sub> at 0 current.

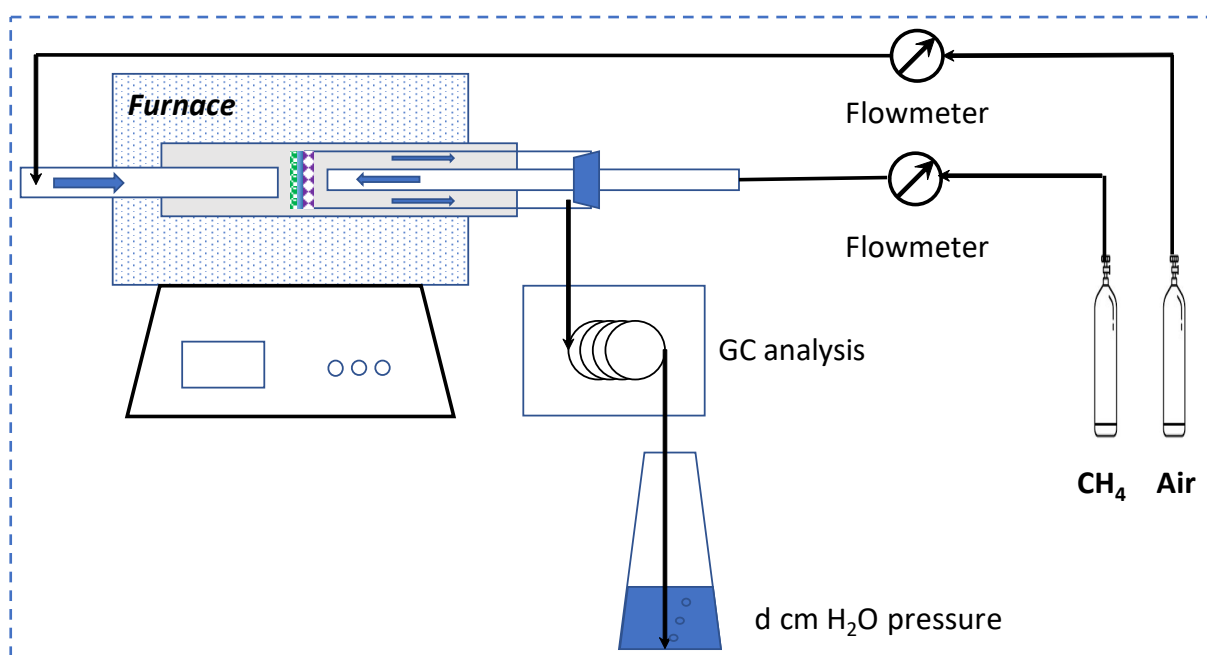

Fig. S7 Schematic of the experimental setup.

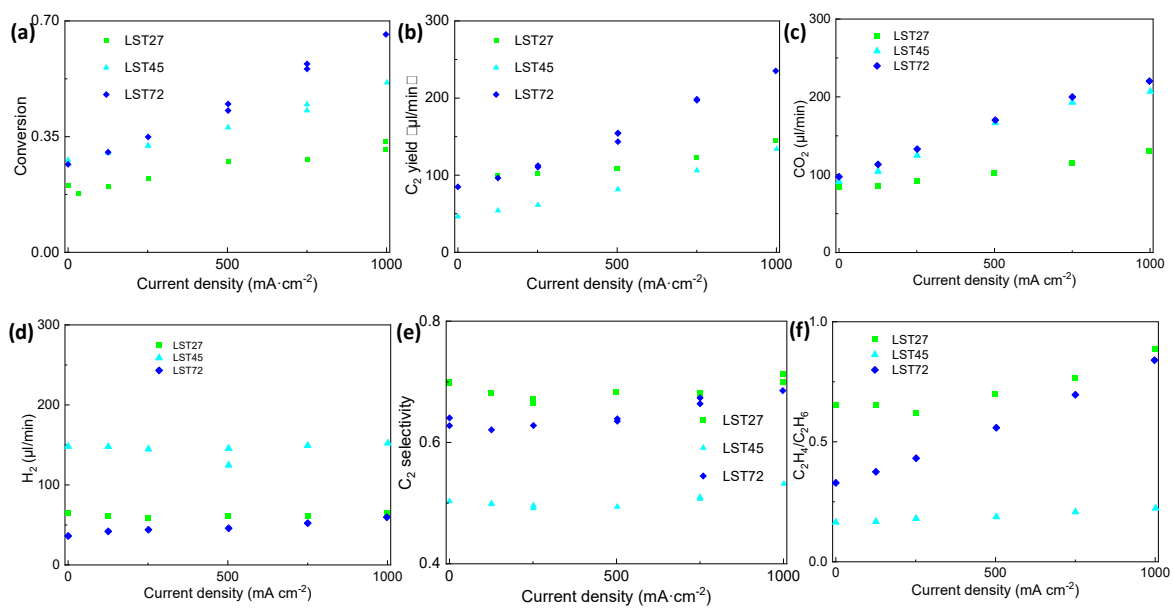

Fig. S8 Catalytic performance for methane conversion using a SOFC button cell design (a) C<sub>2</sub> concentration, (b) CO<sub>2</sub> concentration, (c) H<sub>2</sub> concentration, (d) C<sub>2</sub>H<sub>4</sub>/C<sub>2</sub>H<sub>6</sub> and (e) C<sub>2</sub> selectivity and (f) methane conversion% as a function of current density.

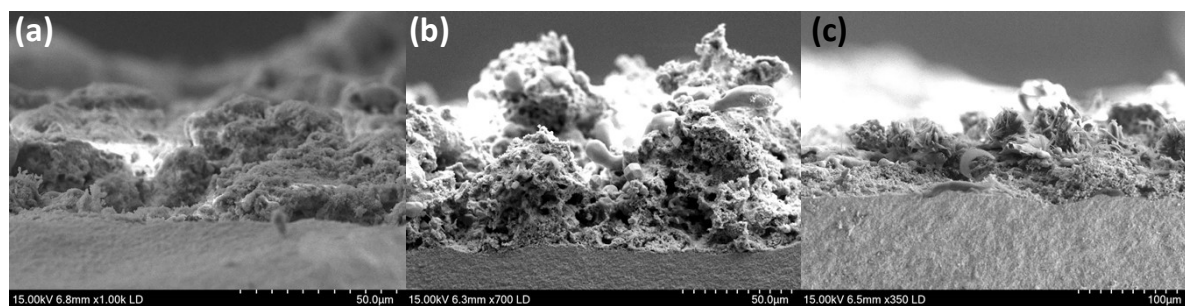

Fig. S9 Cross-sectional images of (a) LST27GDC/GDC, (b) LST45GDC/GDC and (c) LST72GDC/GDC.

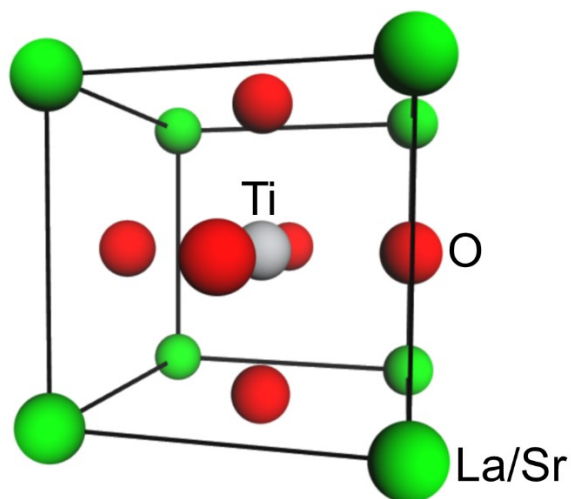

Fig. S10. Crystal structure employed for computational modeling. The structure is based on  $\text{SrTiO}_3$  crystal, in which the Sr positions are replaced by La in different proportions. La/Sr: large green spheres; Ti: large grey spheres; O: large red spheres.

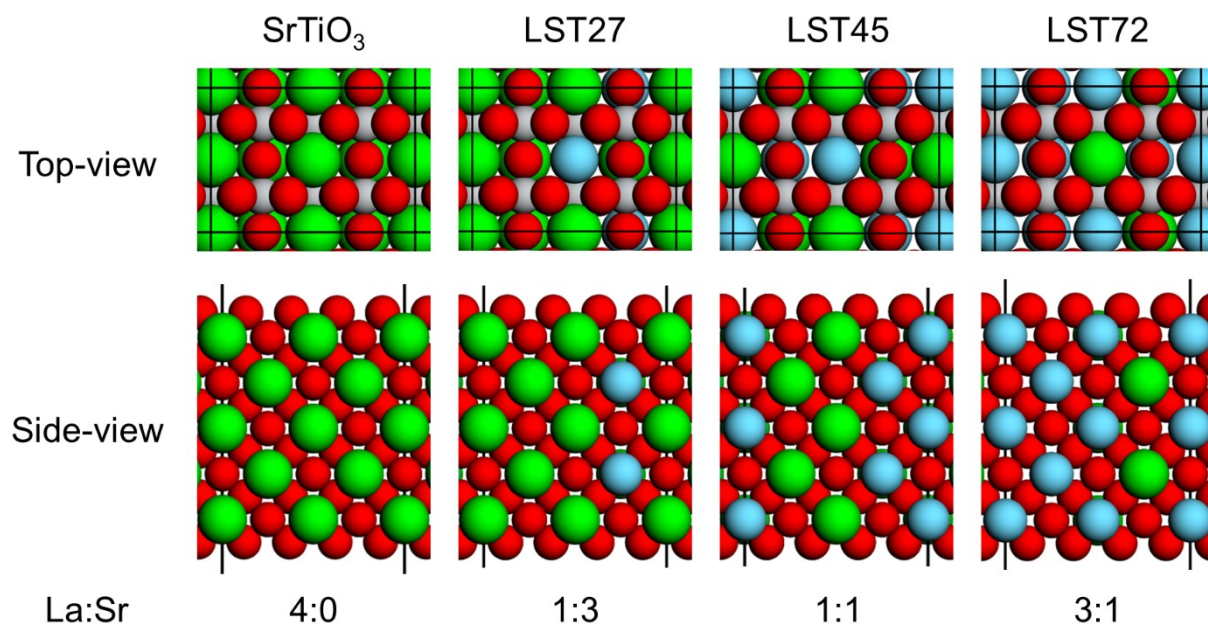

Fig. S11. Computational models of different catalyst surfaces based on  $\text{SrTiO}_3(110)$ . For the simulation of LST27, LST45, and LST72 catalysts, a symmetric model is employed where each La/Sr layer follows La:Sr ratios of 1:3, 1:1, and 3:1, respectively. La: large blue spheres; Sr: large green spheres; Ti: large grey spheres; O: large red spheres.

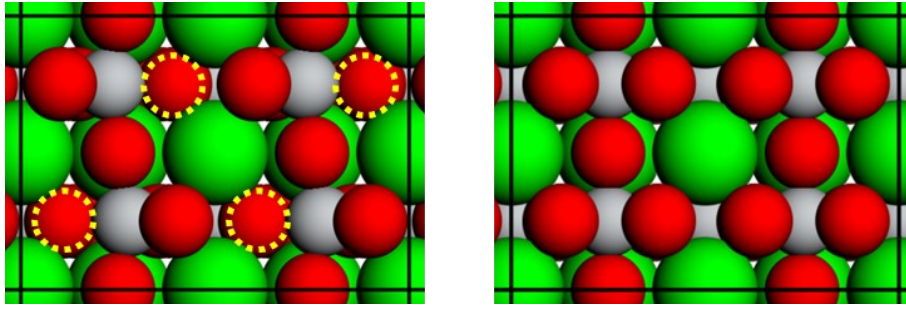

Fig. S12. Surface structures (top view) with (left) and without (right) oxygen (O)-vacancy for calculation of reaction energy ( $\Delta E$ ). The positions of O-vacancies are marked with yellow dotted circles. La/Sr: large green spheres; Ti: large grey spheres; O: large red spheres.
